# Supplementary material for: Transcranial direct current stimulation combined with trunk-targeted, proprioceptive neuromuscular facilitation in subacute stroke: a randomized controlled trial
Source: PeerJ journal article supplement (doi:10.7717/peerj.13329), 2022-04-28

**FULL DETAILS (Read-only)**

|                                                                                                                               |                                                                                                                                                                                                                                                                     |                                                                                                  |
|-------------------------------------------------------------------------------------------------------------------------------|---------------------------------------------------------------------------------------------------------------------------------------------------------------------------------------------------------------------------------------------------------------------|--------------------------------------------------------------------------------------------------|
| <b>CTRI Number</b>                                                                                                            | <b>CTRI/2019/09/021270</b> [Registered on: 17/09/2019] <b>Trial Registered Prospectively</b>                                                                                                                                                                        |                                                                                                  |
| <b>Last Modified On:</b>                                                                                                      | 14/09/2019                                                                                                                                                                                                                                                          |                                                                                                  |
| <b>Post Graduate Thesis</b>                                                                                                   | No                                                                                                                                                                                                                                                                  |                                                                                                  |
| <b>Type of Trial</b>                                                                                                          | Interventional                                                                                                                                                                                                                                                      |                                                                                                  |
| <b>Type of Study</b>                                                                                                          | Physiotherapy (Not Including YOGA)                                                                                                                                                                                                                                  |                                                                                                  |
| <b>Study Design</b>                                                                                                           | Randomized, Parallel Group, Active Controlled Trial                                                                                                                                                                                                                 |                                                                                                  |
| <b>Public Title of Study</b>                                                                                                  | Electrical brain stimulation along with physical therapy effect on improving function in patients with sub-acute stroke                                                                                                                                             |                                                                                                  |
| <b>Scientific Title of Study</b>                                                                                              | Transcranial direct current stimulation combined with trunk targeted proprioceptive neuromuscular facilitation and its effects on impairments, activity limitations and participation restrictions of subjects with sub-acute stroke: A randomized controlled trial |                                                                                                  |
| <b>Secondary IDs if Any</b>                                                                                                   | <b>Secondary ID</b>                                                                                                                                                                                                                                                 | <b>Registry</b>                                                                                  |
|                                                                                                                               | NIL                                                                                                                                                                                                                                                                 | NIL                                                                                              |
| <b>Details of Principal Investigator or overall Trial Coordinator (multi-center study)</b><br><a href="#">Modification(s)</a> | <b>Name</b>                                                                                                                                                                                                                                                         | Ajay Kumar Midde                                                                                 |
|                                                                                                                               | <b>Address</b>                                                                                                                                                                                                                                                      | Department of Physiotherapy, Krishna Institute of medical Sciences, Ministers road, Secunderabad |
|                                                                                                                               | <b>Address</b>                                                                                                                                                                                                                                                      | Hyderabad<br>TELANGANA<br>500003<br>India                                                        |
|                                                                                                                               | <b>Phone</b>                                                                                                                                                                                                                                                        | 00919908167776                                                                                   |
|                                                                                                                               | <b>Fax</b>                                                                                                                                                                                                                                                          |                                                                                                  |
|                                                                                                                               | <b>Email</b>                                                                                                                                                                                                                                                        | ajaymidde85@gmail.com                                                                            |
| <b>Details Contact Person Scientific Query</b><br><a href="#">Modification(s)</a>                                             | <b>Name</b>                                                                                                                                                                                                                                                         | Ajay Kumar Midde                                                                                 |
|                                                                                                                               | <b>Address</b>                                                                                                                                                                                                                                                      | Krishna Institute of medical Sciences, Ministers road, Secunderabad                              |
|                                                                                                                               | <b>Address</b>                                                                                                                                                                                                                                                      | Hyderabad<br>TELANGANA<br>500003<br>India                                                        |
|                                                                                                                               | <b>Phone</b>                                                                                                                                                                                                                                                        | 00919908167776                                                                                   |
|                                                                                                                               | <b>Fax</b>                                                                                                                                                                                                                                                          |                                                                                                  |
|                                                                                                                               | <b>Email</b>                                                                                                                                                                                                                                                        | ajaymidde85@gmail.com                                                                            |
| <b>Details Contact Person Public Query</b><br><a href="#">Modification(s)</a>                                                 | <b>Name</b>                                                                                                                                                                                                                                                         | Ajay Kumar Midde                                                                                 |
|                                                                                                                               | <b>Address</b>                                                                                                                                                                                                                                                      | Krishna Institute of medical Sciences, Ministers road, Secunderabad                              |
|                                                                                                                               | <b>Address</b>                                                                                                                                                                                                                                                      | Hyderabad<br>TELANGANA                                                                           |

|                                                               |                                                                                                                                                                                                                                                                                                                                                                                                                                                                                      |                                                                                                                                                                                                                      |                                 |                          |                                                                                      |                                          |                                                                                                                                                                                                                      |                     |                        |                       |                                       |                                                                                              |                                 |
|---------------------------------------------------------------|--------------------------------------------------------------------------------------------------------------------------------------------------------------------------------------------------------------------------------------------------------------------------------------------------------------------------------------------------------------------------------------------------------------------------------------------------------------------------------------|----------------------------------------------------------------------------------------------------------------------------------------------------------------------------------------------------------------------|---------------------------------|--------------------------|--------------------------------------------------------------------------------------|------------------------------------------|----------------------------------------------------------------------------------------------------------------------------------------------------------------------------------------------------------------------|---------------------|------------------------|-----------------------|---------------------------------------|----------------------------------------------------------------------------------------------|---------------------------------|
|                                                               | 500003<br>India                                                                                                                                                                                                                                                                                                                                                                                                                                                                      |                                                                                                                                                                                                                      |                                 |                          |                                                                                      |                                          |                                                                                                                                                                                                                      |                     |                        |                       |                                       |                                                                                              |                                 |
| <b>Phone</b>                                                  | 00919908167776                                                                                                                                                                                                                                                                                                                                                                                                                                                                       |                                                                                                                                                                                                                      |                                 |                          |                                                                                      |                                          |                                                                                                                                                                                                                      |                     |                        |                       |                                       |                                                                                              |                                 |
| <b>Fax</b>                                                    |                                                                                                                                                                                                                                                                                                                                                                                                                                                                                      |                                                                                                                                                                                                                      |                                 |                          |                                                                                      |                                          |                                                                                                                                                                                                                      |                     |                        |                       |                                       |                                                                                              |                                 |
| <b>Email</b>                                                  | ajaymidde85@gmail.com                                                                                                                                                                                                                                                                                                                                                                                                                                                                |                                                                                                                                                                                                                      |                                 |                          |                                                                                      |                                          |                                                                                                                                                                                                                      |                     |                        |                       |                                       |                                                                                              |                                 |
| <b>Source of Monetary or Material Support Modification(s)</b> | Department of Medical rehabilitation Sciences, College of Applied Medical Science, C/3/108, Guraiger, King Khalid University, Abha, 61421, Kingdom of Saudi Arabia                                                                                                                                                                                                                                                                                                                   |                                                                                                                                                                                                                      |                                 |                          |                                                                                      |                                          |                                                                                                                                                                                                                      |                     |                        |                       |                                       |                                                                                              |                                 |
| <b>Primary Sponsor</b>                                        | <table border="1"> <tr> <td><b>Name</b></td> <td>King Khalid University</td> </tr> <tr> <td><b>Address</b></td> <td>C/3/108, Building C, Guraiger, King Khalid University, Abha, Kingdom of Saudi Arabia</td> </tr> <tr> <td><b>Type of Sponsor</b></td> <td>Government medical college</td> </tr> </table>                                                                                                                                                                          | <b>Name</b>                                                                                                                                                                                                          | King Khalid University          | <b>Address</b>           | C/3/108, Building C, Guraiger, King Khalid University, Abha, Kingdom of Saudi Arabia | <b>Type of Sponsor</b>                   | Government medical college                                                                                                                                                                                           |                     |                        |                       |                                       |                                                                                              |                                 |
| <b>Name</b>                                                   | King Khalid University                                                                                                                                                                                                                                                                                                                                                                                                                                                               |                                                                                                                                                                                                                      |                                 |                          |                                                                                      |                                          |                                                                                                                                                                                                                      |                     |                        |                       |                                       |                                                                                              |                                 |
| <b>Address</b>                                                | C/3/108, Building C, Guraiger, King Khalid University, Abha, Kingdom of Saudi Arabia                                                                                                                                                                                                                                                                                                                                                                                                 |                                                                                                                                                                                                                      |                                 |                          |                                                                                      |                                          |                                                                                                                                                                                                                      |                     |                        |                       |                                       |                                                                                              |                                 |
| <b>Type of Sponsor</b>                                        | Government medical college                                                                                                                                                                                                                                                                                                                                                                                                                                                           |                                                                                                                                                                                                                      |                                 |                          |                                                                                      |                                          |                                                                                                                                                                                                                      |                     |                        |                       |                                       |                                                                                              |                                 |
| <b>Details of Secondary Sponsor</b>                           | <table border="1"> <tr> <td><b>Name</b></td> <td><b>Address</b></td> </tr> <tr> <td>NIL</td> <td>NIL</td> </tr> </table>                                                                                                                                                                                                                                                                                                                                                             | <b>Name</b>                                                                                                                                                                                                          | <b>Address</b>                  | NIL                      | NIL                                                                                  |                                          |                                                                                                                                                                                                                      |                     |                        |                       |                                       |                                                                                              |                                 |
| <b>Name</b>                                                   | <b>Address</b>                                                                                                                                                                                                                                                                                                                                                                                                                                                                       |                                                                                                                                                                                                                      |                                 |                          |                                                                                      |                                          |                                                                                                                                                                                                                      |                     |                        |                       |                                       |                                                                                              |                                 |
| NIL                                                           | NIL                                                                                                                                                                                                                                                                                                                                                                                                                                                                                  |                                                                                                                                                                                                                      |                                 |                          |                                                                                      |                                          |                                                                                                                                                                                                                      |                     |                        |                       |                                       |                                                                                              |                                 |
| <b>Countries of Recruitment</b>                               | India<br>Saudi Arabia                                                                                                                                                                                                                                                                                                                                                                                                                                                                |                                                                                                                                                                                                                      |                                 |                          |                                                                                      |                                          |                                                                                                                                                                                                                      |                     |                        |                       |                                       |                                                                                              |                                 |
| <b>Sites of Study Modification(s)</b>                         | <table border="1"> <tr> <td colspan="4" style="text-align: center;">No of Sites = 1</td> </tr> <tr> <td><b>Contact Person</b></td> <td><b>Name of Site</b></td> <td><b>Site Address</b></td> <td><b>Phone/Fax/Email</b></td> </tr> <tr> <td>Dr Jaya Shanker Tedla</td> <td>Krishna Institute of Medical Sciences</td> <td>Department of Physiotherapy, 2nd floor, New Building, Ministers Road, Secunderabad Hyderabad</td> <td>7674897379<br/>jtedla@kku.edu.sa</td> </tr> </table> | No of Sites = 1                                                                                                                                                                                                      |                                 |                          |                                                                                      | <b>Contact Person</b>                    | <b>Name of Site</b>                                                                                                                                                                                                  | <b>Site Address</b> | <b>Phone/Fax/Email</b> | Dr Jaya Shanker Tedla | Krishna Institute of Medical Sciences | Department of Physiotherapy, 2nd floor, New Building, Ministers Road, Secunderabad Hyderabad | 7674897379<br>jtedla@kku.edu.sa |
| No of Sites = 1                                               |                                                                                                                                                                                                                                                                                                                                                                                                                                                                                      |                                                                                                                                                                                                                      |                                 |                          |                                                                                      |                                          |                                                                                                                                                                                                                      |                     |                        |                       |                                       |                                                                                              |                                 |
| <b>Contact Person</b>                                         | <b>Name of Site</b>                                                                                                                                                                                                                                                                                                                                                                                                                                                                  | <b>Site Address</b>                                                                                                                                                                                                  | <b>Phone/Fax/Email</b>          |                          |                                                                                      |                                          |                                                                                                                                                                                                                      |                     |                        |                       |                                       |                                                                                              |                                 |
| Dr Jaya Shanker Tedla                                         | Krishna Institute of Medical Sciences                                                                                                                                                                                                                                                                                                                                                                                                                                                | Department of Physiotherapy, 2nd floor, New Building, Ministers Road, Secunderabad Hyderabad                                                                                                                         | 7674897379<br>jtedla@kku.edu.sa |                          |                                                                                      |                                          |                                                                                                                                                                                                                      |                     |                        |                       |                                       |                                                                                              |                                 |
| <b>Details of Ethics Committee</b>                            | <table border="1"> <tr> <td colspan="2" style="text-align: center;">No of Ethics Committees= 1</td> </tr> <tr> <td><b>Name of Committee</b></td> <td><b>Approval Status</b></td> </tr> <tr> <td>Ethics Committee for Scientific Research</td> <td>Approved</td> </tr> </table>                                                                                                                                                                                                       | No of Ethics Committees= 1                                                                                                                                                                                           |                                 | <b>Name of Committee</b> | <b>Approval Status</b>                                                               | Ethics Committee for Scientific Research | Approved                                                                                                                                                                                                             |                     |                        |                       |                                       |                                                                                              |                                 |
| No of Ethics Committees= 1                                    |                                                                                                                                                                                                                                                                                                                                                                                                                                                                                      |                                                                                                                                                                                                                      |                                 |                          |                                                                                      |                                          |                                                                                                                                                                                                                      |                     |                        |                       |                                       |                                                                                              |                                 |
| <b>Name of Committee</b>                                      | <b>Approval Status</b>                                                                                                                                                                                                                                                                                                                                                                                                                                                               |                                                                                                                                                                                                                      |                                 |                          |                                                                                      |                                          |                                                                                                                                                                                                                      |                     |                        |                       |                                       |                                                                                              |                                 |
| Ethics Committee for Scientific Research                      | Approved                                                                                                                                                                                                                                                                                                                                                                                                                                                                             |                                                                                                                                                                                                                      |                                 |                          |                                                                                      |                                          |                                                                                                                                                                                                                      |                     |                        |                       |                                       |                                                                                              |                                 |
| <b>Regulatory Clearance Status from DCGI</b>                  | <table border="1"> <tr> <td><b>Status</b></td> </tr> <tr> <td>Not Applicable</td> </tr> </table>                                                                                                                                                                                                                                                                                                                                                                                     | <b>Status</b>                                                                                                                                                                                                        | Not Applicable                  |                          |                                                                                      |                                          |                                                                                                                                                                                                                      |                     |                        |                       |                                       |                                                                                              |                                 |
| <b>Status</b>                                                 |                                                                                                                                                                                                                                                                                                                                                                                                                                                                                      |                                                                                                                                                                                                                      |                                 |                          |                                                                                      |                                          |                                                                                                                                                                                                                      |                     |                        |                       |                                       |                                                                                              |                                 |
| Not Applicable                                                |                                                                                                                                                                                                                                                                                                                                                                                                                                                                                      |                                                                                                                                                                                                                      |                                 |                          |                                                                                      |                                          |                                                                                                                                                                                                                      |                     |                        |                       |                                       |                                                                                              |                                 |
| <b>Health Condition / Problems Studied</b>                    | <table border="1"> <tr> <td><b>Health Type</b></td> <td><b>Condition</b></td> </tr> <tr> <td>Patients</td> <td>Cerebral infarction, unspecified</td> </tr> </table>                                                                                                                                                                                                                                                                                                                  | <b>Health Type</b>                                                                                                                                                                                                   | <b>Condition</b>                | Patients                 | Cerebral infarction, unspecified                                                     |                                          |                                                                                                                                                                                                                      |                     |                        |                       |                                       |                                                                                              |                                 |
| <b>Health Type</b>                                            | <b>Condition</b>                                                                                                                                                                                                                                                                                                                                                                                                                                                                     |                                                                                                                                                                                                                      |                                 |                          |                                                                                      |                                          |                                                                                                                                                                                                                      |                     |                        |                       |                                       |                                                                                              |                                 |
| Patients                                                      | Cerebral infarction, unspecified                                                                                                                                                                                                                                                                                                                                                                                                                                                     |                                                                                                                                                                                                                      |                                 |                          |                                                                                      |                                          |                                                                                                                                                                                                                      |                     |                        |                       |                                       |                                                                                              |                                 |
| <b>Intervention / Comparator Agent</b>                        | <table border="1"> <tr> <td><b>Type</b></td> <td><b>Name</b></td> <td><b>Details</b></td> </tr> <tr> <td>Comparator Agent</td> <td>Conventional Physical Therapy</td> <td>In this group, the total intervention will be for one and a half hour. Muscle elongation exercises for tight muscles, strengthening exercises for weak muscles, weight-bearing and shifting in sitting and standing,</td> </tr> </table>                                                                   | <b>Type</b>                                                                                                                                                                                                          | <b>Name</b>                     | <b>Details</b>           | Comparator Agent                                                                     | Conventional Physical Therapy            | In this group, the total intervention will be for one and a half hour. Muscle elongation exercises for tight muscles, strengthening exercises for weak muscles, weight-bearing and shifting in sitting and standing, |                     |                        |                       |                                       |                                                                                              |                                 |
| <b>Type</b>                                                   | <b>Name</b>                                                                                                                                                                                                                                                                                                                                                                                                                                                                          | <b>Details</b>                                                                                                                                                                                                       |                                 |                          |                                                                                      |                                          |                                                                                                                                                                                                                      |                     |                        |                       |                                       |                                                                                              |                                 |
| Comparator Agent                                              | Conventional Physical Therapy                                                                                                                                                                                                                                                                                                                                                                                                                                                        | In this group, the total intervention will be for one and a half hour. Muscle elongation exercises for tight muscles, strengthening exercises for weak muscles, weight-bearing and shifting in sitting and standing, |                                 |                          |                                                                                      |                                          |                                                                                                                                                                                                                      |                     |                        |                       |                                       |                                                                                              |                                 |

|                                             |                                                 |                                                                                                                                                                                                                                                                                                                                                                                                                                                                                                                                                                                                                                                                                                                                                                                                                                                                                                                                                                                                                                      |
|---------------------------------------------|-------------------------------------------------|--------------------------------------------------------------------------------------------------------------------------------------------------------------------------------------------------------------------------------------------------------------------------------------------------------------------------------------------------------------------------------------------------------------------------------------------------------------------------------------------------------------------------------------------------------------------------------------------------------------------------------------------------------------------------------------------------------------------------------------------------------------------------------------------------------------------------------------------------------------------------------------------------------------------------------------------------------------------------------------------------------------------------------------|
|                                             |                                                 | range of motion exercises and gait training activities.                                                                                                                                                                                                                                                                                                                                                                                                                                                                                                                                                                                                                                                                                                                                                                                                                                                                                                                                                                              |
|                                             | Intervention                                    | Conventional Physical Therapy, Trunk targeted proprioceptive neuromuscular facilitation (PNF)<br>In this group, the total intervention will be for one and half hour. It includes one hour of Conventional Physical Therapy and 30 minutes trunk targeted PNF. The PNF exercises were based on functional limitation and capability of an individual patient. The therapist will strictly follow the fundamental principles of the PNF method like manual contact, body position and body mechanics, verbal commands, vision, traction/approximation, stretch, timing, and repetitions. Trunk chopping and lifting patterns, bilateral lower limb/upper limb patterns, combined scapular, and pelvic patterns will be used to facilitate trunk. These exercises will be done in different positions like supine, side-lying, prone, sitting and standing based on patient capabilities. Techniques of PNF are incorporated based on patient requirement but Stabilizing reversals / Rhythmic stabilization are mandatory techniques. |
|                                             | Intervention                                    | Trans Cranial Direct Current Conventional Physical therapy , Stimulation with Trunk targeted and Proprioceptive Neuro muscular facilitation<br>In this group, the total intervention will be for one and a half hour. It includes 40 minutes of Conventional Physical Therapy, 30 minutes trunk targeted PNF and 20 minutes tDCS. Details of tDCS are provided below. tDCS treatment parameters Machine used Neuro-Conn DC stimulator plus or Sotirex tDCS machine Montage basis International EEG 10 – 20 system Software used to test montage Bonsai—Model Solution Analyzer Montage used Bicephalic Montage Anode on affected side C3-C4 Cathode on unaffected side C3-C4 Pad size 5X5 cm The intensity of the current 2 mA Duration of treatment 20 min Number of sessions per week 4 Total number of treatment weeks 6 Total number of session 24                                                                                                                                                                               |
| <b>Inclusion Criteria</b>                   | <b>Age From</b>                                 | 18.00 Year(s)                                                                                                                                                                                                                                                                                                                                                                                                                                                                                                                                                                                                                                                                                                                                                                                                                                                                                                                                                                                                                        |
|                                             | <b>Age To</b>                                   | 75.00 Year(s)                                                                                                                                                                                                                                                                                                                                                                                                                                                                                                                                                                                                                                                                                                                                                                                                                                                                                                                                                                                                                        |
|                                             | <b>Gender</b>                                   | Both                                                                                                                                                                                                                                                                                                                                                                                                                                                                                                                                                                                                                                                                                                                                                                                                                                                                                                                                                                                                                                 |
|                                             | <b>Details</b>                                  | 1. Age range 18-75 years<br>2. First-time supratentorial stroke diagnosed by MRI/CT scan<br>3. Between 7 days to 6 months post-stroke<br>4. Able to understand and follow the commands                                                                                                                                                                                                                                                                                                                                                                                                                                                                                                                                                                                                                                                                                                                                                                                                                                               |
| <b>ExclusionCriteria</b>                    | <b>Details</b>                                  | 1. Any metals in the cranium/ cochlear implants/ cardiac pacemakers<br>2. Having an unstable epileptic disorder<br>3. Associated comorbid diseases like cancer/ HIV/Hepatitis or any other neuromuscular disorders which affect the subjects capability to do exercise                                                                                                                                                                                                                                                                                                                                                                                                                                                                                                                                                                                                                                                                                                                                                               |
| <b>Method of Generating Random Sequence</b> | Stratified block randomization                  |                                                                                                                                                                                                                                                                                                                                                                                                                                                                                                                                                                                                                                                                                                                                                                                                                                                                                                                                                                                                                                      |
| <b>Method of</b>                            | Sequentially numbered, sealed, opaque envelopes |                                                                                                                                                                                                                                                                                                                                                                                                                                                                                                                                                                                                                                                                                                                                                                                                                                                                                                                                                                                                                                      |

| <b>Concealment</b>                                                                                                                                                                                                                                                                                                                                                                                                                                                                              |                                                                                                                                                                                                                                                                                                                                                                                                                                                                                                                                                                                                                                                                                                                                                                                                                                        |         |            |                                                                                                                                                                                                                                                                                                                                                                                                                                                                                                 |                                                                                              |
|-------------------------------------------------------------------------------------------------------------------------------------------------------------------------------------------------------------------------------------------------------------------------------------------------------------------------------------------------------------------------------------------------------------------------------------------------------------------------------------------------|----------------------------------------------------------------------------------------------------------------------------------------------------------------------------------------------------------------------------------------------------------------------------------------------------------------------------------------------------------------------------------------------------------------------------------------------------------------------------------------------------------------------------------------------------------------------------------------------------------------------------------------------------------------------------------------------------------------------------------------------------------------------------------------------------------------------------------------|---------|------------|-------------------------------------------------------------------------------------------------------------------------------------------------------------------------------------------------------------------------------------------------------------------------------------------------------------------------------------------------------------------------------------------------------------------------------------------------------------------------------------------------|----------------------------------------------------------------------------------------------|
| <b>Blinding/Masking</b>                                                                                                                                                                                                                                                                                                                                                                                                                                                                         | Participant, Investigator and Outcome Assessor Blinded                                                                                                                                                                                                                                                                                                                                                                                                                                                                                                                                                                                                                                                                                                                                                                                 |         |            |                                                                                                                                                                                                                                                                                                                                                                                                                                                                                                 |                                                                                              |
| <b>Primary Outcome</b>                                                                                                                                                                                                                                                                                                                                                                                                                                                                          | <table border="1"> <thead> <tr> <th>Outcome</th> <th>TimePoints</th> </tr> </thead> <tbody> <tr> <td>1. Trunk impairment scale measures trunk activity and measured as a clinical test 2. Fugl-Meyer Assessment of Motor Recovery after stroke (FMA) measures upper and lower limb activity and measured as a clinical test 3. 10 Meter Walk Test (10mWT) measures gait speed and measured as a clinical test 4. Timed up and go test measures balance and gait activity 5. Wolf Motor Function Test measures upper limb activity and measured as a clinical test 6. Stroke Specific Quality of life</td> <td>Baseline and after 6 weeks</td> </tr> </tbody> </table>                                                                                                                                                                  | Outcome | TimePoints | 1. Trunk impairment scale measures trunk activity and measured as a clinical test 2. Fugl-Meyer Assessment of Motor Recovery after stroke (FMA) measures upper and lower limb activity and measured as a clinical test 3. 10 Meter Walk Test (10mWT) measures gait speed and measured as a clinical test 4. Timed up and go test measures balance and gait activity 5. Wolf Motor Function Test measures upper limb activity and measured as a clinical test 6. Stroke Specific Quality of life | Baseline and after 6 weeks                                                                   |
| Outcome                                                                                                                                                                                                                                                                                                                                                                                                                                                                                         | TimePoints                                                                                                                                                                                                                                                                                                                                                                                                                                                                                                                                                                                                                                                                                                                                                                                                                             |         |            |                                                                                                                                                                                                                                                                                                                                                                                                                                                                                                 |                                                                                              |
| 1. Trunk impairment scale measures trunk activity and measured as a clinical test 2. Fugl-Meyer Assessment of Motor Recovery after stroke (FMA) measures upper and lower limb activity and measured as a clinical test 3. 10 Meter Walk Test (10mWT) measures gait speed and measured as a clinical test 4. Timed up and go test measures balance and gait activity 5. Wolf Motor Function Test measures upper limb activity and measured as a clinical test 6. Stroke Specific Quality of life | Baseline and after 6 weeks                                                                                                                                                                                                                                                                                                                                                                                                                                                                                                                                                                                                                                                                                                                                                                                                             |         |            |                                                                                                                                                                                                                                                                                                                                                                                                                                                                                                 |                                                                                              |
| <b>Secondary Outcome</b><br><a href="#">Modification(s)</a>                                                                                                                                                                                                                                                                                                                                                                                                                                     | <table border="1"> <thead> <tr> <th>Outcome</th> <th>TimePoints</th> </tr> </thead> <tbody> <tr> <td>1. Age 2. Gender 3. Stroke Onset 4. Type of Stroke 5. Severity of Stroke 6. Type of Treatme</td> <td>These secondary outcomes required only for doing correlations they are obtained on week one.</td> </tr> </tbody> </table>                                                                                                                                                                                                                                                                                                                                                                                                                                                                                                    | Outcome | TimePoints | 1. Age 2. Gender 3. Stroke Onset 4. Type of Stroke 5. Severity of Stroke 6. Type of Treatme                                                                                                                                                                                                                                                                                                                                                                                                     | These secondary outcomes required only for doing correlations they are obtained on week one. |
| Outcome                                                                                                                                                                                                                                                                                                                                                                                                                                                                                         | TimePoints                                                                                                                                                                                                                                                                                                                                                                                                                                                                                                                                                                                                                                                                                                                                                                                                                             |         |            |                                                                                                                                                                                                                                                                                                                                                                                                                                                                                                 |                                                                                              |
| 1. Age 2. Gender 3. Stroke Onset 4. Type of Stroke 5. Severity of Stroke 6. Type of Treatme                                                                                                                                                                                                                                                                                                                                                                                                     | These secondary outcomes required only for doing correlations they are obtained on week one.                                                                                                                                                                                                                                                                                                                                                                                                                                                                                                                                                                                                                                                                                                                                           |         |            |                                                                                                                                                                                                                                                                                                                                                                                                                                                                                                 |                                                                                              |
| <b>Target Sample Size</b><br><a href="#">Modification(s)</a>                                                                                                                                                                                                                                                                                                                                                                                                                                    | <b>Total Sample Size="54"</b><br><b>Sample Size from India="27"</b>                                                                                                                                                                                                                                                                                                                                                                                                                                                                                                                                                                                                                                                                                                                                                                    |         |            |                                                                                                                                                                                                                                                                                                                                                                                                                                                                                                 |                                                                                              |
| <b>Phase of Trial</b>                                                                                                                                                                                                                                                                                                                                                                                                                                                                           | Phase 1/ Phase 2                                                                                                                                                                                                                                                                                                                                                                                                                                                                                                                                                                                                                                                                                                                                                                                                                       |         |            |                                                                                                                                                                                                                                                                                                                                                                                                                                                                                                 |                                                                                              |
| <b>Date of First Enrollment (India)</b>                                                                                                                                                                                                                                                                                                                                                                                                                                                         | 17/09/2019                                                                                                                                                                                                                                                                                                                                                                                                                                                                                                                                                                                                                                                                                                                                                                                                                             |         |            |                                                                                                                                                                                                                                                                                                                                                                                                                                                                                                 |                                                                                              |
| <b>Date of First Enrollment (Global)</b>                                                                                                                                                                                                                                                                                                                                                                                                                                                        | 17/09/2019                                                                                                                                                                                                                                                                                                                                                                                                                                                                                                                                                                                                                                                                                                                                                                                                                             |         |            |                                                                                                                                                                                                                                                                                                                                                                                                                                                                                                 |                                                                                              |
| <b>Estimated Duration of Trial</b>                                                                                                                                                                                                                                                                                                                                                                                                                                                              | <b>Years="0"</b><br><b>Months="10"</b><br><b>Days="0"</b>                                                                                                                                                                                                                                                                                                                                                                                                                                                                                                                                                                                                                                                                                                                                                                              |         |            |                                                                                                                                                                                                                                                                                                                                                                                                                                                                                                 |                                                                                              |
| <b>Recruitment Status of Trial (Global)</b><br><a href="#">Modification(s)</a>                                                                                                                                                                                                                                                                                                                                                                                                                  | Not Yet Recruiting                                                                                                                                                                                                                                                                                                                                                                                                                                                                                                                                                                                                                                                                                                                                                                                                                     |         |            |                                                                                                                                                                                                                                                                                                                                                                                                                                                                                                 |                                                                                              |
| <b>Recruitment Status of Trial (India)</b>                                                                                                                                                                                                                                                                                                                                                                                                                                                      | Not Yet Recruiting                                                                                                                                                                                                                                                                                                                                                                                                                                                                                                                                                                                                                                                                                                                                                                                                                     |         |            |                                                                                                                                                                                                                                                                                                                                                                                                                                                                                                 |                                                                                              |
| <b>Publication Details</b><br><a href="#">Modification(s)</a>                                                                                                                                                                                                                                                                                                                                                                                                                                   | Nil                                                                                                                                                                                                                                                                                                                                                                                                                                                                                                                                                                                                                                                                                                                                                                                                                                    |         |            |                                                                                                                                                                                                                                                                                                                                                                                                                                                                                                 |                                                                                              |
| <b>Brief Summary</b>                                                                                                                                                                                                                                                                                                                                                                                                                                                                            | Background and study aim: Stroke is the foremost cause of death and disability throughout the world. Combining the neuromodulation capability of Transcranial Direct Current Stimulation (tDCS) with a strong clinical treatment tool like Proprioceptive Neuromuscular Facilitation (PNF) could make excellent improvements in the lives of stroke population. tDCS is a non-invasive, painless brain stimulation treatment that uses direct electrical currents to stimulate specific parts of the brain. A constant, low-intensity current is passed through two electrodes placed over the head which modulates brain cell activity. PNF stretching is an advanced form of flexibility training. It involves the contraction and stretching of muscles. Currently, there is dearth of literature pertaining to this combination of |         |            |                                                                                                                                                                                                                                                                                                                                                                                                                                                                                                 |                                                                                              |

tDCS with PNF in improving function and quality of life in subjects with subacute stroke.

The aim of this study is to find the effect of tDCS combined with trunk targeted PNF on impairments, activity limitations and participation restrictions of subjects with sub-acute stroke

Who can participate? Stroke patients aged between 18-75 years who meet the inclusion criteria

What does the study involve? The participants undergo some evaluations, tDCS, and physical exercise treatments over a six week period.

What are the possible benefits and risks of participating? There is a possibility that the patient functional capacity will improve and there is no critical risk of participating in the study Some subjects can feel some fatigue after the exercise

Where is the study run from? King Khalid University, Saudi Arabia

When is the study starting and how long is it expected to run for? May 2019 to May 2020

Who is funding the study? Investigator-initiated and funded

Who is the main contact? Dr. Jaya Shanker Tedla [jtledla@kku.edu.sa](mailto:jtledla@kku.edu.sa)

[Close](#)



Supplement: CTRI_protocol_file.pdf [file CTRI_protocol_file.pdf]
